# Supplementary material
Source: publisher site journal article supplement (https://www.dovepress.com/article/302508)
Supplement: Supplementary file 1 [file get_supplementary_file.php]

**Supplementary Information**

**Figure S1.** Estimation of sample size by G power software

**
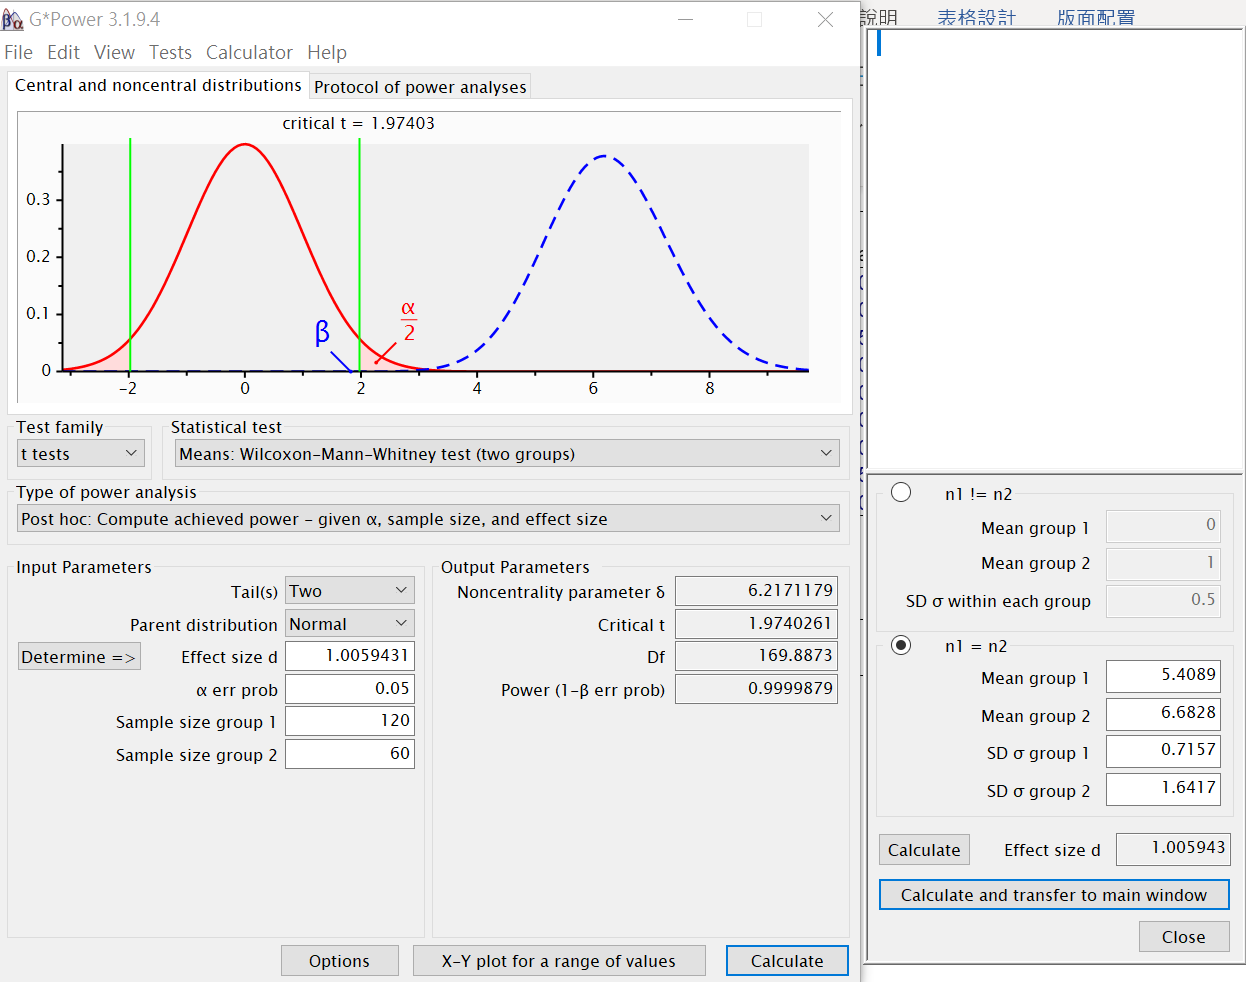
**

**Table S1** The Expression of Circadian Clock Genes in Asthmatic Patients With and Without Night Symptoms

|  | **With Night Symptoms**  **(n = 53)** | | **Without Night Symptoms**  **(n = 67)** | |  |
| --- | --- | --- | --- | --- | --- |
| **Gene** | **Median (-ΔC*t*)** | **Average Rank** | **Median (-ΔC*t*)** | **Average Rank** | ***P* value** |
| *BMAL1* | -5.39 | 60.86 | -5.56 | 60.22 | 0.9200 |
| *CKIε* | -9.24 | 60.47 | -9.15 | 60.52 | 0.9937 |
| *CLOCK* | -7.99 | 62.59 | -7.97 | 58.84 | 0.5574 |
| *CRY1* | -10.88 | 65.71 | -10.74 | 56.38 | 0.1447 |
| *CRY2* | -7.08 | 60.87 | -7.02 | 60.21 | 0.9179 |
| *PER1* | -8.38 | 58.58 | -8.65 | 62.02 | 0.5898 |
| *PER2* | -7.74 | 59.97 | -7.8 | 60.92 | 0.8824 |
| *PER3* | -11.29 | 67.80 | -10.83 | 54.72 | **0.0408*** |
| *TIM* | -9.41 | 63.61 | -9.16 | 58.04 | 0.3832 |

**Note:** The Median were calculated using the values of -ΔC*t* [–(C*t* of Circadian clock gene – C*t* of *ACTB* gene)]. Higher –ΔC*t* represents higher expression level, and *vice versa*. The *P* values indicated were evaluated with Mann-Whitney test. **P* < 0.05

**Table S2** Expression of Circadian Clock Genes in Well- and Not Well-controlled Asthmatic Patients With and Without Night Symptoms

|  | **Well controlled Asthma** | | | **Not-well controlled Asthma** | | |
| --- | --- | --- | --- | --- | --- | --- |
| **Gene** | **With**  **Night Symptoms**  **(n = 16)** | **Without**  **Night Symptoms**  **(n = 44)** | ***P* value** | **With**  **Night Symptoms**  **(n = 16)** | **Without**  **Night Symptoms**  **(n = 44)** | ***P* value** |
| *BMAL1* | -5.93 (38.72) | -5.49 (26.76) | **0.0174*** | -5.25 (26.93) | -5.65 (36.24) | **0.0447*** |
| *CKIε* | -9.67 (39.22) | -9.04 (26.57) | **0.0119*** | -8.98 (26.19) | -9.64 (37.43) | **0.0153*** |
| *CLOCK* | -8.42 (37.75) | -7.89 (27.12) | **0.0345*** | -7.65 (28.22) | -8.06 (34.17) | 0.1988 |
| *CRY1* | -11.14 (39.03) | -10.53 (26.64) | **0.0137*** | -10.85 (28.45) | -10.97 (33.80) | 0.2478 |
| *CRY2* | -7.46 (37.69) | -6.75 (27.14) | **0.0360*** | -6.88 (27.14) | -7.33 (35.91) | 0.0584 |
| *PER1* | -9.12 (40.00) | -8.10 (26.28) | **0.0064**** | -7.95 (24.11) | -9.16 (40.78) | **0.0003**** |
| *PER2* | -8.03 (36.50) | -7.64 (27.58) | 0.0762 | -7.65 (26.77) | -7.96 (36.50) | **0.0359*** |
| *PER3* | -11.12 (36.63) | -10.77 (27.53) | 0.0707 | -11.34 (31.07) | -11.14 (29.59) | 0.7495 |
| *TIM* | -9.48 (36.38) | -9.00 (27.62) | 0.0820 | -9.24 (29.16) | -9.33 (32.65) | 0.4517 |

**Note:** Dataare expressed as median (average rank). Median was calculated using the values of -ΔC*t* [–(C*t* of Circadian clock gene – C*t* of *ACTB* gene)]. Higher –ΔC*t* represents higher expression level, and *vice versa*. The *P* values indicated were evaluated with Mann-Whitney test between patients without and with night symptoms. **P* < 0.05 *****P* < 0.01
